# Supplementary material for: Variations in health-related quality of life (EQ-5D) associated with cardiovascular health: a cross-sectional study of adults with diabetes in the Korean general population
Source: HighWire-hosted journal article supplement (doi:10.1136/bmjopen-2023-081789), 2024-05-01
Supplement: bmjopen-2023-081789supp001_data_supplement.pdf [file bmjopen-2023-081789supp001_data_supplement.pdf]

Supplementary Table 1. Frequency distribution of each EQ-5D dimension among diabetes patients.

|                    | All          | Men          | Women        | P-value |
|--------------------|--------------|--------------|--------------|---------|
| Mobility           |              |              |              | <.0001  |
| no problems        | 2014 (75.7%) | 1161 (80.9%) | 853 (68.1%)  |         |
| some problems      | 774 (23.2%)  | 348 (18.6%)  | 426 (30.1%)  |         |
| extreme problems   | 41 (1.0%)    | 9 (0.5%)     | 32 (1.8%)    |         |
| Self-care          |              |              |              | 0.0479  |
| no problems        | 2558 (92.0%) | 1391 (93.0%) | 1167 (90.5%) |         |
| some problems      | 249 (7.4%)   | 116 (6.5%)   | 133 (8.7%)   |         |
| extreme problems   | 22 (0.6%)    | 11 (0.5%)    | 11 (0.8%)    |         |
| Usual activities   |              |              |              | <.0001  |
| no problems        | 2350 (85.7%) | 1308 (88.6%) | 1042 (81.4%) |         |
| some problems      | 443 (13.4%)  | 195 (10.7%)  | 248 (17.3%)  |         |
| extreme problems   | 36 (1.0%)    | 15 (0.7%)    | 21 (1.3%)    |         |
| Pain/discomfort    |              |              |              | <.0001  |
| no problems        | 1902 (70.3%) | 1111 (75.7%) | 791 (62.2%)  |         |
| some problems      | 798 (25.9%)  | 369 (22.5%)  | 429 (30.9%)  |         |
| extreme problems   | 129 (3.8%)   | 38 (1.7%)    | 91 (6.9%)    |         |
| Anxiety/depression |              |              |              | <.0001  |
| no problems        | 2425 (86.8%) | 1342 (89.3%) | 1083 (83.2%) |         |
| some problems      | 369 (12.0%)  | 168 (10.2%)  | 201 (14.5%)  |         |
| extreme problems   | 35 (1.2%)    | 8 (0.5%)     | 27 (2.2%)    |         |

Values are sample n and weighted percentage  
P-value by Rao-Scott chi-square test

Supplementary Table2. Prevalence odds ratios of having problems in each EQ-5D dimension among diabetes patients and general population (comparison between men and women)

|                                            | Mobility            |         | Self-care           |         | Usual activities    |         | Pain/discomfort     |         | Anxiety/depression  |         |
|--------------------------------------------|---------------------|---------|---------------------|---------|---------------------|---------|---------------------|---------|---------------------|---------|
|                                            | OR (95% CI)         | P-value |
| Diabetes patients (older than 40 years)    |                     |         |                     |         |                     |         |                     |         |                     |         |
| Men                                        | 1(Ref)              |         |
| Women                                      | 1.45<br>(1.18-1.78) | <.001   | 1.08<br>(0.81-1.43) | 0.602   | 1.37<br>(1.08-1.74) | 0.010   | 1.63<br>(1.34-1.97) | <.001   | 1.46<br>(1.13-1.88) | 0.004   |
| General population (older than 40 years) * |                     |         |                     |         |                     |         |                     |         |                     |         |
| Men                                        | 1(Ref)              |         |
| Women                                      | 1.64<br>(1.47-1.82) | <.001   | 1.34<br>(1.13-1.58) | <.001   | 1.70<br>(1.50-1.92) | <.001   | 1.86<br>(1.71-2.02) | <.001   | 1.88<br>(1.66-2.13) | <.001   |

Adjusted for age, education level and marital status

P-value by multivariable binary logistic regression

\*study population excluded
